# Supplementary material for: Liquid metal electrodes enabled cascaded on-chip dielectrophoretic separation of large-size-range particles
Source: Royal Society of Chemistry journal article supplement (doi:10.1039/d4lc00942h), 2024-12-12
Supplement: d4lc00942h1.xlsx [file d4lc00942h1.xlsx]

## Sheet: Outlet distribution
	HeLa		WBCs		RBCs		0.5 μm Beads		0.5 μm Beads
	Percentage	SD	Percentage	SD	Percentage	SD	Percentage	SD	Percentage	SD
O\-(5)	0	0	0	0	6.46333	1.79603	33.5977	0.50486	99.3197	1.17827
O\-(4)	0	0	1.23457	2.13833	14.7367	3.10061	66.4023	0.50486	0.68027	1.17827
O\-(3)	0	0	8.58025	1.31381	74.3667	3.12151	0	0	0	0
O\-(2)	3.8066	0.56205	85.8951	1.393	4.43333	0.86257	0	0	0	0
O\-(1)	96.1934	0.56205	4.29012	0.65691	0	0	0	0	0	0

## Sheet: Outlet purity
	HeLa		WBCs		RBCs		0.5 μm Beads		0.5 μm Beads
	Percentage	SD	Percentage	SD	Percentage	SD	Percentage	SD	Percentage	SD
O\-(1)	95.1853	1.2681	4.81466	1.2681	0	0	0	0	0	0
O\-(2)	4.24648	0.3605	85.6795	7.41797	10.074	7.21797	0	0	0	0
O\-(3)	0	0	5.07583	1.23343	94.2942	1.23343	0	0	0	0
O\-(4)	0	0	0.53799	0.37439	15.8562	2.42961	83.3547	2.24651	0.25106	0.60996
O\-(5)	0	0	0	0	8.20629	2.10053	49.7677	2.96962	42.026	5.02147

## Sheet: Inlet distribution
	HeLa	WBCs	RBCs	0.5 μm Beads	10 μm Beads
I\-(1)	0	0	0	0	0
I\-(2)	100	100	100	100	100
I\-(3)	0	0	0	0	0

## Sheet: Inlet purity
	HeLa		WBCs		RBCs		0.5 μm Beads		0.5 μm Beads
	Percentage	SD	Percentage	SD	Percentage	SD	Percentage	SD	Percentage	SD
I\-(1)	0	0	0	0	0	0	0	0	0	0
I\-(2)	10.9015	1.3897	15.0943	3.15557	29.7694	2.80007	35.4298	2.34948	8.80503	1.16473
I\-(3)	0	0	0	0	0	0	0	0	0	0
